# Supplementary material for: Stereochemical errors and their implications for molecular dynamics simulations
Source: Springer Nature journal article supplement (doi:10.1186/1471-2105-12-190), 2011-05-23

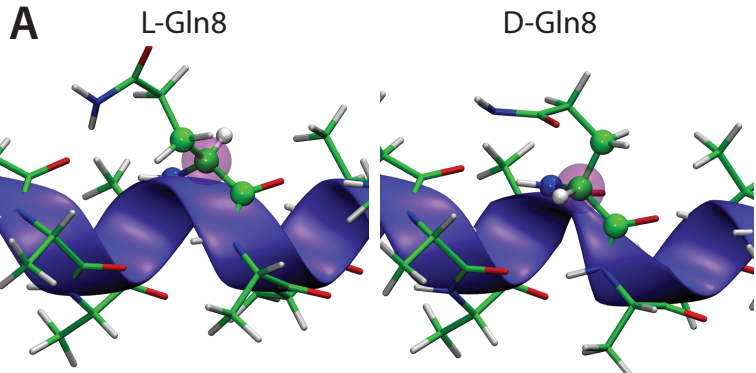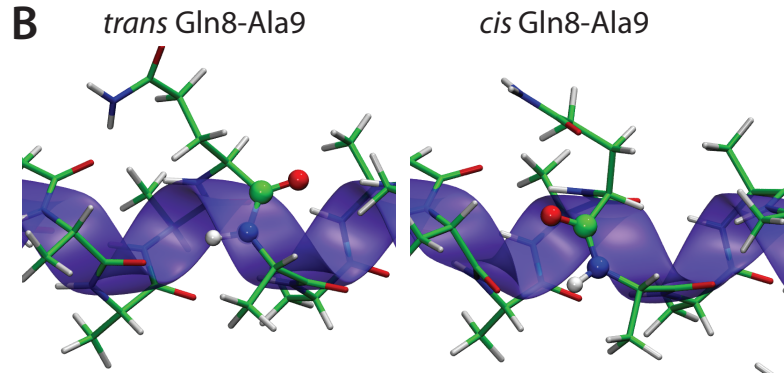

Supplement: 12859_2011_4586_MOESM2_ESM.pdf [file 12859_2011_4586_MOESM2_ESM.pdf]
