# Supplementary material for: Stereochemical errors and their implications for molecular dynamics simulations
Source: Springer Nature journal article supplement (doi:10.1186/1471-2105-12-190), 2011-05-23

**A**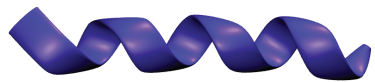

32ns  
↓

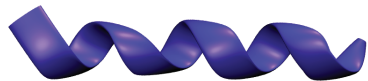**B**

Chiral error  
at position 8

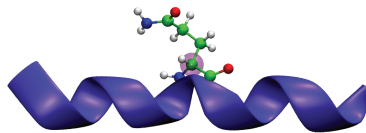

32ns  
↓

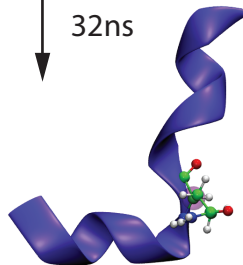**C**

*Cis* peptide bond  
at position 8-9

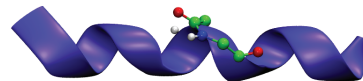

32ns  
↓

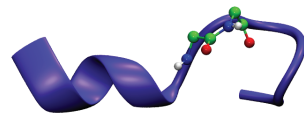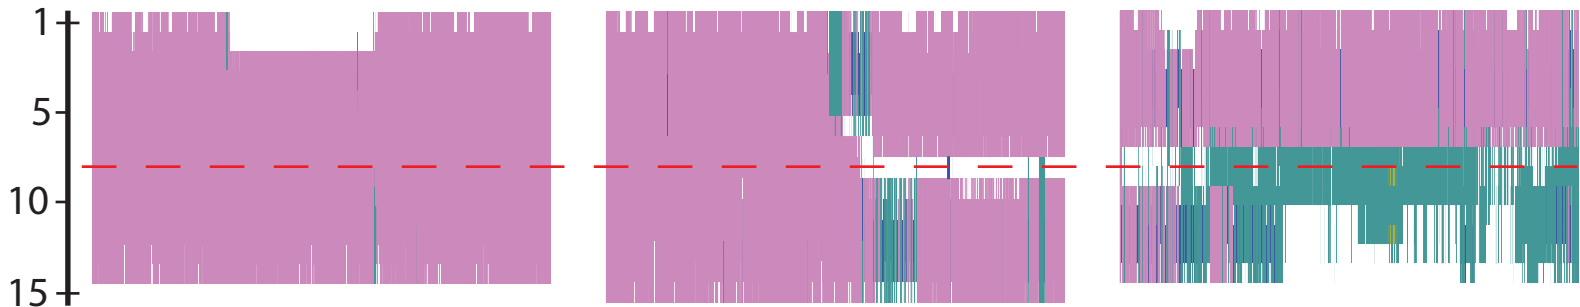

Supplement: 12859_2011_4586_MOESM3_ESM.pdf [file 12859_2011_4586_MOESM3_ESM.pdf]
